# Supplementary material
Source: MDPI journal article supplement (https://www.mdpi.com/2073-4352/9/2/118)
Supplement: s1 [file s1]

# Hierarchical Core/Shell Structured Ag@Ni(OH)<sub>2</sub> Nanospheres as Binder-Free Electrodes for High Performance Supercapacitors

Sa Lv \*, Xuefeng Chu, Fan Yang, Huan Wang, Jia Yang, Yaodan Chi and Xiaotian Yang \*

Jilin Provincial Key Laboratory of Architectural Electricity & Comprehensive Energy Saving, School of Electrical Engineering and Computer, Jilin Jianzhu University, Changchun 130118, China;  
stone2009@126.com; ctpnxxn@163.com; whuan@ciac.ac.cn; yangjia@jlju.edu.cn; chiyaodan@jlju.edu.cn

\* Correspondence: lvsa82@163.com (S.L.); hanyxt@163.com (X.Y.); Tel.: +86-0431-8456-6181 (S.L.)

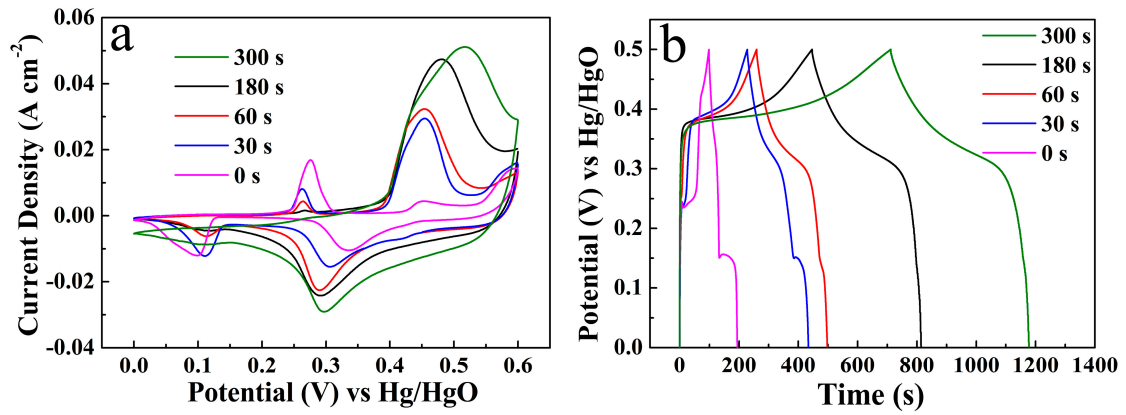

**Figure S1.** Ag@Ni(OH)<sub>2</sub> electrode corresponding to different Ni(OH)<sub>2</sub> deposition time: (a) CV curves; (b) GCD curves.

The specific capacitance of Ag@Ni(OH)<sub>2</sub> electrode can be obtained by the following equation:

$$C_s = \frac{\int I(V)dV}{2vS\Delta V}$$

where  $C_s$  (F cm<sup>-2</sup>) is the specific capacitance,  $I(V)$  (A) is the response current,  $V$  (V) is the potential vs. Hg/HgO,  $v$  (V s<sup>-1</sup>) is the scan rate,  $S$  (cm<sup>2</sup>) is the effective area of the electrode and  $\Delta V$  (V) is the working potential. So the specific capacitance decreases with the increase of scan rate.

The specific capacitance of Ag@Ni(OH)<sub>2</sub> electrode can be obtained by the following equation:

$$C_s = \frac{I \times \Delta t}{S\Delta V}$$

where  $C_s$  (F cm<sup>-2</sup>) is the specific capacitance,  $I$  (A) is the charge-discharge current,  $\Delta t$  (s) is the discharging time,  $S$  (cm<sup>2</sup>) is the effective area of the electrode and  $\Delta V$  (V) represents the potential drop during discharge.

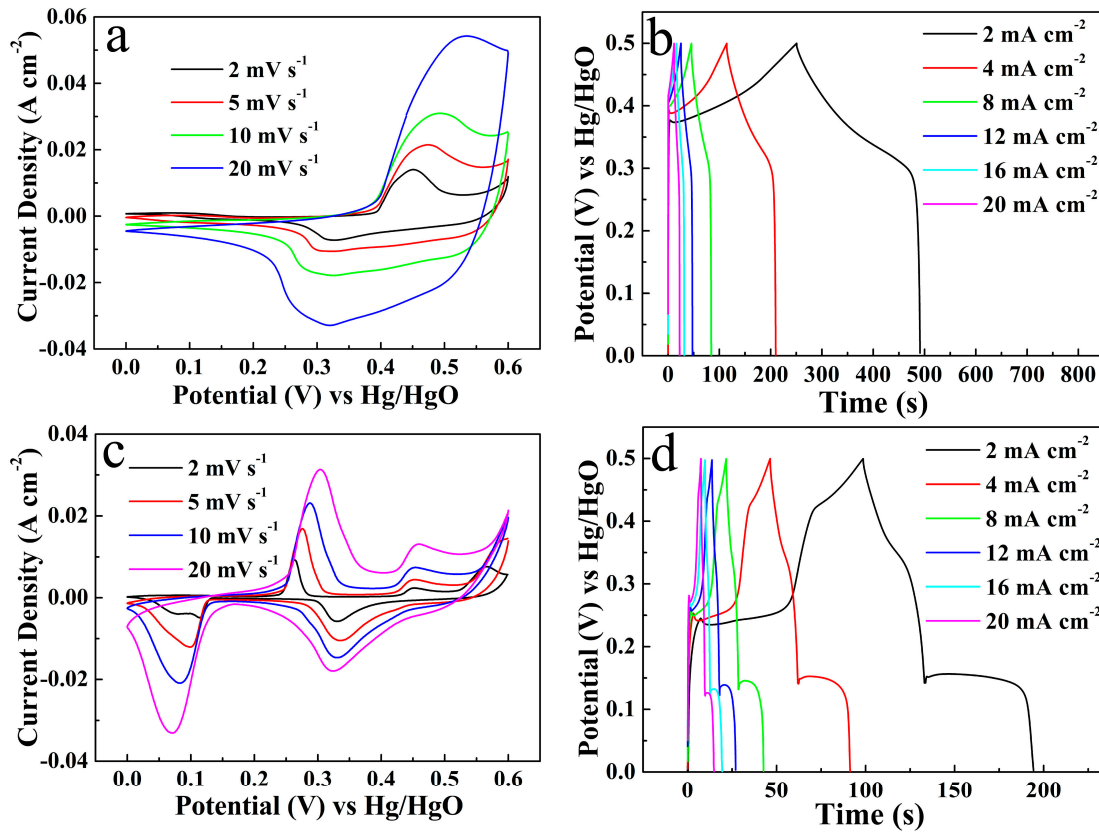

Figure S2. (a,c) The CV curves and (b,d) GCD curves of Ni(OH)<sub>2</sub> and the Ag electrode, respectively.

Table S1. The specific capacitance versus current density of the three electrodes.

| Electrode<br>$C_s$ (F cm <sup>-2</sup> ) | 2 mA  | 4 mA  | 8 mA  | 12 mA | 16 mA | 20 mA |
|------------------------------------------|-------|-------|-------|-------|-------|-------|
| Ag@Ni(OH) <sub>2</sub>                   | 1.864 | 1.395 | 1.098 | 0.946 | 0.838 | 0.760 |
| Ni(OH) <sub>2</sub>                      | 0.962 | 0.766 | 0.619 | 0.540 | 0.480 | 0.436 |
| Ag                                       | 0.388 | 0.359 | 0.336 | 0.319 | 0.310 | 0.296 |

The average equivalent series resistance ( $R_{ESR}$ ) are derived from the equation:

$$R_{ESR} = \frac{V_{drop}}{2I}$$

where,  $V_{drop}$  (V) is the abrupt voltage drop at the beginning of the discharging curve and  $I$  (A) is the corresponding current.

Table S2. The  $R_{ESR}$  and voltage drop versus current density of the Ag@Ni(OH)<sub>2</sub> electrode.

| $I$ (mA)                                        | 2 mA   | 4 mA   | 8 mA   | 12 mA  | 16 mA  | 20 mA  |
|-------------------------------------------------|--------|--------|--------|--------|--------|--------|
| $V_{drop}$ (V)                                  | 0.0043 | 0.0081 | 0.0156 | 0.0230 | 0.0305 | 0.0380 |
| $R_{ESR}$ ( $\Omega$ cm <sup>-2</sup> )         | 1.075  | 1.015  | 0.975  | 0.958  | 0.953  | 0.950  |
| Average $R_{ESR}$ ( $\Omega$ cm <sup>-2</sup> ) | 0.988  |        |        |        |        |        |

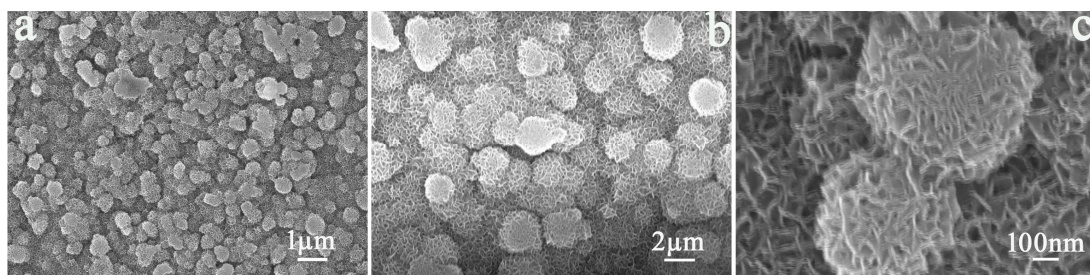

**Figure S3.** FE-SEM images of the Ag@Ni(OH)<sub>2</sub> composite at different magnifications after 3000 cycles.
